# Supplementary material
Source: PubMed Central journal article supplement (PMC8693224)
Supplement: jama-e2121187-s002.pdf [file jama-e2121187-s002.pdf]

## Supplemental Online Content

Okereke OI, Vyas CM, Mischoulon D, et al. Effect of long-term omega-3 fatty acid supplementation vs placebo on risk of depression or clinically relevant depressive symptoms and on change in mood scores: a randomized clinical trial. *JAMA*. doi:10.1001/jama.2021.21187

**Table 1.** Detailed Baseline Characteristics of Participants, According to Randomized Omega-3 Fatty Acid and Placebo Groups

**eTable 2.** Mean Difference in Change Since Baseline in PHQ-8 Score Comparing Omega-3 Fatty Acid and Placebo Groups, According to Baseline Sub-groups

**eTable 3.** Adjusted Means at Baseline and Mean Change (95% CI) in PHQ-8 Scores at Each Year Since Randomization Compared to Baseline, According to Omega-3 Fatty Acid and Placebo Groups, Censoring PHQ-8 Scores after Initiation of Antidepressants

**eTable 4.** Participant-Reported Adherence with the Omega-3 Fatty Acid and Placebo Study Pills (% of Pills Taken) for All Time Points, among Participants Responding to Compliance Questionnaires

**eTable 5.** Hazard Ratios and 95% CIs for Total, Incident and Recurrent Depression, According to Randomized Assignment to Omega-3 Fatty Acid or Placebo, with Additional Censoring at Time Taking Less than 2/3 Study Pills

**eTable 6a.** Hazard Ratios and 95% CIs for Total, Incident, and Recurrent Depression, According to Randomized Assignment to Omega-3 Fatty Acid or Placebo, with Additional Censoring at Incident CVD

**eTable 6b.** Hazard Ratios and 95% CIs for Total, Incident, and Recurrent Depression, According to Randomized Assignment to Omega-3 Fatty Acid or Placebo, with Additional Adjustment for CVD as a Time-Dependent Covariate

**eTable 7a.** Hazard Ratios and 95% CIs for Total, Incident, and Recurrent Depression, According to Randomized Assignment to Omega-3 Fatty Acid or Placebo, with Additional Censoring at Incident Cancer

**eTable 7b.** Hazard Ratios and 95% CIs for Total, Incident, and Recurrent Depression, According to Randomized Assignment to Omega-3 Fatty Acid or Placebo, with Additional Adjustment for Total Cancer as a Time-Dependent Covariate

**eTable 8.** Subdistribution Hazard Models Comparing the Risk of Depression in the Omega-3 Fatty Acid and Placebo Groups

**eTable 9.** Adjusted Differences in Change in PHQ-8 Scores Since Baseline, Comparing Omega-3 Fatty Acid to Placebo

**eTable 10.** Adjusted Means at Baseline and Mean Change (95% CI) in PHQ-8 Scores at Each Year Since Randomization Compared to Baseline, According to Omega-3 Fatty Acid and Placebo Groups, Censoring PHQ-8 Scores at Date of Mood Safety Letter

**eTable 11.** Adjusted Means at Baseline and Mean Change (95% CI) in PHQ-8 Scores at Each Year Since Randomization Compared to Baseline, According to Omega-3 Fatty Acid and Placebo Groups, Omitting Year 5 PHQ-8 Score

**eTable 12.** Total, Incident and Recurrent Rates of Depression, per 1000 Person-Years (p-y), by Omega-3 Fatty Acid and Placebo Groups

**eTable 13.** Means (SDs) of PHQ-8 Scores at Each Time Point, in Omega-3 Fatty Acid and Placebo Groups

**eTable 14a.** Hazard Ratios and 95% CIs for Total, Incident, and Recurrent Depression among Older Males, According to Randomized Assignment to Omega-3 Fatty Acid or Placebo Groups

**eTable 14b.** Hazard Ratios and 95% CIs for Total, Incident, and Recurrent Depression among Older Females, According to Randomized Assignment to Omega-3 Fatty Acid or Placebo Groups

**eTable 15.** Hazard Ratios and 95% CIs for Total, Incident, and Recurrent Depression, According to Randomized Assignment to Omega-3 Fatty Acid or Placebo, Excluding the First 2 Years of Follow-up

**eTable 16.** Hazard Ratios and 95% CIs of Total, Incident, and Recurrent Depression among Participants with Mild Depressive Symptoms, According to Randomized Assignment to Omega-3 Fatty Acid or Placebo Groups

**eTable 17.** Adjusted Means at Baseline and Mean Change (95% CI) in PHQ-8 Scores at Each Year Since Randomization Compared to Baseline, According to Omega-3 Fatty Acid and Placebo Groups, among Participants with Mild Depressive Symptoms

**eTable 18.** Adverse Events According to Omega-3 Fatty Acid and Placebo Groups

eFigure 1. Adjusted Differences in Change in Likelihood of PHQ-8 Item-Level Symptoms, Comparing Omega-3 Fatty Acid to Placebo

**eFigure 2.** Adjusted Differences in Change in Likelihood of PHQ-8 Item-Level Symptoms, Comparing Omega-3 Fatty Acid to Placebo, Stratified by Biological Sex

**eFigure 3.** Kaplan-Meier Survival Curves Stratified by Biological Sex for Time since Randomization until Occurrence of Primary Outcome (Total Depression), in Omega-3 Fatty Acid and Placebo Groups

**eFigure 4.** Box Plots of Crude PHQ-8 Scores in the Omega-3 Fatty Acid and Placebo Groups in Each Study Year

**eReferences.**

This supplemental material has been provided by the authors to give readers additional information about their work.

**eTable 1.** Detailed Baseline Characteristics of Participants, According to Randomized Omega-3 Fatty Acid and Placebo Groups.

| Baseline Characteristic                      | Omega-3 group         | Placebo group         |
|----------------------------------------------|-----------------------|-----------------------|
|                                              | (n=9171) <sup>a</sup> | (n=9182) <sup>a</sup> |
| Age, y, mean (SD)                            | 67.4 (7.1)            | 67.5 (7.0)            |
| Age groups, y, no. (%)                       |                       |                       |
| 50-54                                        | 354 (3.9)             | 298 (3.3)             |
| 55-64                                        | 2947 (32.1)           | 3018 (32.9)           |
| 65-74                                        | 4633 (50.5)           | 4598 (50.1)           |
| 75+                                          | 1237 (13.5)           | 1268 (13.8)           |
| Sex, no. (%)                                 |                       |                       |
| Males                                        | 4674 (51.0)           | 4656 (50.7)           |
| Females                                      | 4497 (49.0)           | 4526 (49.3)           |
| Racial or ethnic group, no. (%) <sup>b</sup> | n=8982                | n=9007                |
| African American/Black                       | 1683 (18.7)           | 1724 (19.1)           |
| Asian/Pacific Islander                       | 150 (1.7)             | 144 (1.6)             |

| <b>Baseline Characteristic</b>                                    | <b>Omega-3 group<br/>(n=9171)<sup>a</sup></b> | <b>Placebo group<br/>(n=9182)<sup>a</sup></b> |
|-------------------------------------------------------------------|-----------------------------------------------|-----------------------------------------------|
| Hispanic (not African American)                                   | 347 (3.9)                                     | 361 (4.0)                                     |
| Native American/Alaskan Native                                    | 80 (0.9)                                      | 70 (0.8)                                      |
| Non-Hispanic White                                                | 6563 (73.1)                                   | 6534 (72.5)                                   |
| Other <sup>c</sup>                                                | 159 (1.8)                                     | 174 (1.9)                                     |
| Greater than high school education, no./total no. (%)             | 8043 / 9153 (87.9)                            | 8122 / 9162 (88.7)                            |
| Income \$30,000+ per year, no./total no. (%)                      | 6932 / 8248 (84.0)                            | 6853 / 8232 (83.3)                            |
| Body-mass index <sup>d</sup> , mean (SD) [N]                      | 27.8 (5.5) [8950]                             | 27.7 (5.5) [8969]                             |
| Hypertension treated with medication, no./total no. (%)           | 4560 / 9126 (50.0)                            | 4638 / 9136 (50.8)                            |
| Current use of cholesterol-lowering medication, no./total no. (%) | 3322 / 9123 (36.4)                            | 3302 / 9150 (36.1)                            |
| Diabetes, no./total no. (%)                                       | 1165 / 9158 (12.7)                            | 1143 / 9167 (12.5)                            |
| Smoking, no. (%)                                                  | n=9124                                        | n=9143                                        |
| Current                                                           | 4882 (53.5)                                   | 4856 (53.1)                                   |
| Past                                                              | 3684 (40.4)                                   | 3724 (40.7)                                   |
| Never                                                             | 558 (6.1)                                     | 563 (6.2)                                     |

| <b>Baseline Characteristic</b>                                                                 | <b>Omega-3 group<br/>(n=9171)<sup>a</sup></b> | <b>Placebo group<br/>(n=9182)<sup>a</sup></b> |
|------------------------------------------------------------------------------------------------|-----------------------------------------------|-----------------------------------------------|
| Alcohol use frequency, no. (%)                                                                 | n=9047                                        | n=9045                                        |
| Never/rarely                                                                                   | 2716 (30.0)                                   | 2758 (30.5)                                   |
| Monthly                                                                                        | 678 (7.5)                                     | 641 (7.1)                                     |
| Weekly                                                                                         | 3242 (35.8)                                   | 3218 (35.6)                                   |
| Daily                                                                                          | 2411 (26.7)                                   | 2428 (26.8)                                   |
| Total physical activity, MET-hours/week, median (IQR), [N]                                     | 16.8 (5.6-32.9) [9168]                        | 17.0 (5.5-33.4) [9182]                        |
| Current postmenopausal hormone use (females only), no./total no. (%) <sup>e</sup>              | 462 / 4416 (10.5)                             | 477 / 4454 (10.7)                             |
| Current use of multivitamins, no./total no. (%)                                                | 4072 / 9044 (45.0)                            | 4101 / 9040 (45.4)                            |
| Current use of supplemental vitamin D, no./total no. (%) <sup>f</sup>                          | 4067 / 9171 (44.4)                            | 4063 / 9182 (44.3)                            |
| Current use of supplemental calcium ( $\leq$ 1200 mg/day), no./total no. (%) <sup>g</sup>      | 1848 / 9171 (20.2)                            | 1905 / 9182 (20.8)                            |
| Intake of foods related to vitamin D and/or omega-3 fatty acids, <sup>h</sup><br>mean (SD) [N] |                                               |                                               |

| <b>Baseline Characteristic</b>                             | <b>Omega-3 group<br/>(n=9171)<sup>a</sup></b> | <b>Placebo group<br/>(n=9182)<sup>a</sup></b> |
|------------------------------------------------------------|-----------------------------------------------|-----------------------------------------------|
| Milk, servings/day <sup>i</sup>                            | 0.7 (0.9) [8967]                              | 0.7 (0.9) [8960]                              |
| Other vitamin D-fortified foods, servings/day <sup>j</sup> | 0.6 (0.7) [9035]                              | 0.6 (0.7) [9042]                              |
| Dark-meat fish, servings/week <sup>k</sup>                 | 1.0 (1.7) [9023]                              | 1.0 (1.4) [9030]                              |
| Other fish and seafood, servings/week <sup>l</sup>         | 1.1 (1.7) [9031]                              | 1.1 (1.8) [9033]                              |
| Baseline biomarker levels, median (IQR) [N]                |                                               |                                               |
| 25-(OH)D, ng/ml <sup>m</sup>                               | 31.0 (25.0-37.0) [5708]                       | 31.0 (25.0-37.0) [5709]                       |
| EPA, % <sup>n</sup>                                        | 0.5 (0.4-0.7) [5591]                          | 0.5 (0.4-0.7) [5638]                          |
| DHA, % <sup>n</sup>                                        | 1.9 (1.5-2.4) [5598]                          | 1.9 (1.6-2.4) [5639]                          |
| Geographic region, no. (%)                                 | n=9170                                        | n=9182                                        |
| Southeast                                                  | 2483 (27.1)                                   | 2548 (27.8)                                   |
| Northeast                                                  | 2511 (27.4)                                   | 2492 (27.1)                                   |
| West                                                       | 2172 (23.7)                                   | 2116 (23.1)                                   |
| Midwest                                                    | 2004 (21.9)                                   | 2026 (22.1)                                   |
| Charlson-Deyo comorbidity index, <sup>n</sup> no. (%)      |                                               |                                               |

| <b>Baseline Characteristic</b>                        | <b>Omega-3 group<br/>(n=9171)<sup>a</sup></b> | <b>Placebo group<br/>(n=9182)<sup>a</sup></b> |
|-------------------------------------------------------|-----------------------------------------------|-----------------------------------------------|
| 0 point                                               | 7764 (84.7)                                   | 7776 (84.7)                                   |
| 1 point                                               | 1206 (13.2)                                   | 1199 (13.1)                                   |
| 2+ points                                             | 201 (2.2)                                     | 207 (2.3)                                     |
| Randomization in Vitamin D3 portion of trial, no. (%) |                                               |                                               |
| Active agent group                                    | 4608 (50.3)                                   | 4573 (49.8)                                   |
| Placebo group                                         | 4563 (49.8)                                   | 4609 (50.2)                                   |

Abbreviations: SD, standard deviation; IQR, interquartile range; MET, metabolic equivalent of task; 25(OH)D, 25-hydroxyvitamin D; EPA, eicosapentaenoic acid; DHA, docosahexaenoic acid

<sup>a</sup> Unless otherwise stated.

<sup>b</sup> Racial and ethnic group were reported by participants.

<sup>c</sup> Other race/ethnicity includes Native Hawaiian or other Pacific Islander, multiple race or unknown race or unknown ethnicity.

<sup>d</sup> Body-mass index is the weight in kilograms divided by the square of the height in meters. Data were missing for 2.4% of the participants.

<sup>e</sup> Virtually all female participants are postmenopausal (>99%).

<sup>f</sup> ≤800 IU/day from all supplemental sources of vitamin D combined (individual vitamin D supplements, calcium + vitamin D supplements, medications with vitamin D [e.g., Fosamax Plus D], and multivitamins)

<sup>g</sup> ≤1200 mg/day from all supplemental sources of calcium combined

<sup>h</sup> As assessed by a modified version of the Harvard Food Frequency Questionnaire.

<sup>i</sup> Milk: Dairy and soy-milk

<sup>j</sup> Other vitamin-D fortified foods: vitamin D-fortified cereal, vitamin D-fortified orange juice, yogurt

<sup>k</sup> Dark-meat fish: e.g., mackerel, salmon, sardines, bluefish, swordfish, canned tuna

<sup>l</sup> Other fish and seafood: e.g., cod, haddock, halibut, breaded fish cakes, pieces, or fish sticks, shrimp, lobster, scallops

<sup>m</sup> To convert 25(OH)D units to a nanomoles per liter, multiply by 2.5.

<sup>n</sup> Baseline plasma levels of EPA and DHA were expressed as a percent of total phospholipid fatty acids.

<sup>o</sup> The Charlson-Deyo comorbidity index is a weighted comorbidity score derived from the sum of the scores for each of several major medical comorbid conditions<sup>1,2</sup>. Participants were categorized as having 0, 1, or ≥2 points on the Charlson-Deyo comorbidity index.

**eTable 2.** Mean Difference in Change Since Baseline in PHQ-8 Score Comparing Omega-3 Fatty Acid and Placebo Groups, According to Baseline Sub-groups.<sup>a</sup>

| <b>Group</b>                              | <b>No. of participants</b> | <b>Mean difference (95% CI)</b> | <b>P-value (P-interaction)<sup>b</sup></b> |
|-------------------------------------------|----------------------------|---------------------------------|--------------------------------------------|
| Sex                                       |                            |                                 | 0.16                                       |
| Female                                    | 9,023                      | 0.06 (-0.00, 0.12)              |                                            |
| Male                                      | 9,330                      | -0.00 (-0.06, 0.06)             |                                            |
| Age (years)                               |                            |                                 | 0.34                                       |
| 50-64                                     | 6,617                      | -0.00 (-0.08, 0.07)             |                                            |
| 65-74                                     | 9,231                      | 0.04 (-0.02, 0.09)              |                                            |
| 75+                                       | 2,505                      | 0.10 (-0.01, 0.22)              |                                            |
| Racial or ethnic group <sup>c</sup>       |                            |                                 | 0.93                                       |
| African American/Black                    | 3407                       | 0.05 (-0.08, 0.18)              |                                            |
| Non-Hispanic White                        | 13097                      | 0.03 (-0.02, 0.08)              |                                            |
| Other <sup>d</sup>                        | 1485                       | 0.02 (-0.15, 0.19)              |                                            |
| Baseline plasma EPA level, % <sup>e</sup> |                            |                                 | 0.70                                       |



| <b>Group</b>                                 | <b>No. of participants</b> | <b>Mean difference (95% CI)</b> | <b>P-value (P-interaction)<sup>b</sup></b> |
|----------------------------------------------|----------------------------|---------------------------------|--------------------------------------------|
| < Median of 0.50                             | 4318                       | 0.03 (-0.05, 0.12)              |                                            |
| ≥ Median of 0.50                             | 6911                       | 0.06 (-0.01, 0.12)              |                                            |
| Baseline plasma DHA level, % <sup>c</sup>    |                            |                                 | 0.87                                       |
| < Median of 1.90                             | 5001                       | 0.05 (-0.03, 0.13)              |                                            |
| ≥ Median of 1.90                             | 6236                       | 0.04 (-0.03, 0.11)              |                                            |
| Total fish & seafood intake <sup>f</sup>     |                            |                                 | 0.20                                       |
| < Median of 1.47 servings/week               | 9555                       | 0.01 (-0.05, 0.07)              |                                            |
| ≥ Median of 1.47 servings/week               | 8523                       | 0.06 (0.00, 0.13)               |                                            |
| Charlson-Deyo comorbidity index <sup>g</sup> |                            |                                 | 0.29                                       |
| 0 point                                      | 15540                      | 0.01 (-0.03, 0.06)              |                                            |
| 1 point                                      | 2405                       | 0.07 (-0.07, 0.22)              |                                            |
| 2+ points                                    | 408                        | 0.30 (-0.07, 0.68)              |                                            |
| Randomization in Vitamin D3 portion of trial |                            |                                 | 0.24                                       |

| <b>Group</b>       | <b>No. of participants</b> | <b>Mean difference (95% CI)</b> | <b>P-value (P-interaction)<sup>b</sup></b> |
|--------------------|----------------------------|---------------------------------|--------------------------------------------|
| Active agent group | 9181                       | 0.00 (-0.06, 0.06)              |                                            |
| Placebo group      | 9172                       | 0.05 (-0.01, 0.12)              |                                            |

Abbreviation: CI, confidence interval; PHQ, patient health questionnaire; EPA, eicosapentaenoic acid; DHA, docosahexaenoic acid

<sup>a</sup> Analyses were from general linear models of response profiles to estimate the means, with time modeled as indicator variables; models were controlled for age, sex, and vitamin D3 randomization group. Adjusted mean differences (95% CI) between the omega-3 fatty acid and placebo groups in PHQ-8 change scores averaged across all follow-up years (years 1-5) are shown within sub-groups.

<sup>b</sup> P-interaction is from the test of the sub-group-x-treatment-x-follow-up time interaction term in the model.

<sup>c</sup> Racial and ethnic group were reported by participants.

<sup>d</sup> Other race/ethnicity group included Hispanic (not African American), Asian, Native Hawaiian or other Pacific Islander, multiple race or unknown race or unknown ethnicity.

<sup>e</sup> Baseline plasma levels of EPA and DHA were expressed as a percent of total phospholipid fatty acids.

<sup>f</sup> Total fish and seafood intake includes dark-meat fish: e.g., mackerel, salmon, sardines, bluefish, swordfish; canned tuna, Other fish and seafood: e.g., cod, haddock, halibut; breaded fish cakes, pieces, or fish sticks; shrimp, lobster, scallops.

<sup>g</sup> The Charlson-Deyo comorbidity index is a weighted comorbidity score derived from the sum of the scores for each of several major medical comorbid conditions<sup>1,2</sup>. Participants were categorized as having 0, 1, or  $\geq 2$  points on the Charlson-Deyo comorbidity index.

**eTable 3.** Adjusted Means at Baseline and Mean Change (95% CI) in PHQ-8 Scores at Each Year Since Randomization Compared to Baseline, According to Omega-3 Fatty Acid and Placebo Groups, Censoring PHQ-8 Scores after Initiation of Antidepressants.<sup>a</sup>

| PHQ-8 score                                   | Omega-3 group          |                           | Placebo group          |                           | Mean difference<br>(95% CI) <sup>b</sup> | P-value | P-interaction |
|-----------------------------------------------|------------------------|---------------------------|------------------------|---------------------------|------------------------------------------|---------|---------------|
|                                               | Number of participants | Adjusted mean<br>(95% CI) | Number of participants | Adjusted mean<br>(95% CI) |                                          |         |               |
| Baseline                                      | 9171                   | 1.09 (1.06, 1.13)         | 9182                   | 1.11 (1.08, 1.15)         | --                                       | --      | 0.51          |
| Year 1 vs Baseline                            | 8411                   | 0.04 (0.00, 0.07)         | 8506                   | 0.01 (-0.03, 0.04)        | 0.03 (-0.02, 0.08)                       | 0.28    |               |
| Year 2 vs Baseline                            | 8245                   | 0.06 (0.02, 0.10)         | 8297                   | 0.03 (-0.01, 0.07)        | 0.03 (-0.03, 0.08)                       | 0.37    |               |
| Year 3 vs Baseline                            | 7973                   | 0.09 (0.05, 0.13)         | 8052                   | 0.05 (0.01, 0.09)         | 0.05 (-0.01, 0.11)                       | 0.11    |               |
| Year 4 vs Baseline                            | 7500                   | 0.06 (0.02, 0.10)         | 7545                   | 0.04 (0.00, 0.08)         | 0.02 (-0.04, 0.08)                       | 0.43    |               |
| Year 5 vs Baseline                            | 5144                   | 0.15 (0.10, 0.20)         | 5133                   | 0.17 (0.12, 0.22)         | -0.01 (-0.08, 0.06)                      | 0.70    |               |
| <b>Average (across Years 1-5) vs Baseline</b> | <b>9171</b>            |                           | <b>9182</b>            |                           | <b>0.03 (-0.02, 0.07)</b>                | 0.24    |               |

Abbreviation: CI, confidence interval; PHQ, patient health questionnaire

<sup>a</sup> Analyses were from general linear models of response profiles to estimate the means, with time modeled as indicator variables; models were controlled for age, sex, and vitamin D3 randomization group. Adjusted means (95% CI) within each treatment group are shown at baseline and adjusted mean differences in change (95% CI) within each treatment group are shown for each follow-up time point. P-interaction is from the 5-degree-freedom test of the treatment-x-time interaction term in the model.

<sup>b</sup> Mean differences in change comparing omega-3 fatty acid and placebo groups; the last row shows the adjusted mean difference (95% CI) between the omega-3 fatty acid and placebo groups in PHQ-8 change scores averaged across all follow-up years (years 1-5 vs. baseline).

**eTable 4.** Participant-Reported Adherence with the Omega-3 Fatty Acid and Placebo Study Pills (% of Pills Taken) for All Time Points, among Participants Responding to Compliance Questionnaires.

| <b>Time</b> | <b>Omega-3 group</b> | <b>Placebo group</b> |
|-------------|----------------------|----------------------|
| Baseline    | 9171/9171 (100.0)    | 9182/9182 (100.0)    |
| Year 1      | 8162/8634 (94.5)     | 8228/8683 (94.8)     |
| Year 2      | 7743/8417 (92.0)     | 7759/8393 (92.5)     |
| Year 3      | 7441/8156 (91.2)     | 7436/8148 (91.3)     |
| Year 4      | 7031/7707 (91.2)     | 7013/7689 (91.2)     |
| Year 5      | 4650/5149 (90.3)     | 4632/5086 (91.1)     |

**eTable 5.** Hazard Ratios and 95% CIs for Total, Incident and Recurrent Depression, According to Randomized Assignment to Omega-3 Fatty Acid or Placebo, with Additional Censoring at Time Taking Less than 2/3 Study Pills.<sup>a</sup>

| Outcome                           | Omega-3 group                    | Placebo group | HR (95% CI)        | P-value |
|-----------------------------------|----------------------------------|---------------|--------------------|---------|
|                                   | <i>Event/no. of participants</i> |               |                    |         |
| Total depression <sup>b</sup>     | 516/9171                         | 454/9182      | 1.15 (1.01 – 1.30) | 0.03    |
| Incident depression <sup>c</sup>  | 385/8322                         | 340/8355      | 1.14 (0.99 – 1.32) | 0.08    |
| Recurrent depression <sup>c</sup> | 131/849                          | 114/847       | 1.14 (0.89 – 1.47) | 0.31    |

Abbreviation: HR, hazard ratio; CI, confidence interval

<sup>a</sup> Analyses were from Cox regression models that were controlled for age, sex, and vitamin D3 randomization group. Analyses were not adjusted for multiple comparisons.

<sup>b</sup> Depression is a composite outcome comprising reported presence of clinician diagnosis of depression, treatment for depression and/or symptoms above the validated cutoff for major depression on the PHQ-8 (PHQ-8 $\geq$ 10); total depression consists of all incident and recurrent depression combined.

<sup>c</sup> Incident and recurrent depression were exploratory outcomes. Incident depression was defined as depression cases that occurred among those with no past history of depression; recurrent depression was defined as depression cases that occurred among those with past history of depression, but not under treatment or active in the past 2 years.

**eTable 6a.** Hazard Ratios and 95% CIs for Total, Incident, and Recurrent Depression, According to Randomized Assignment to Omega-3 Fatty Acid or Placebo, with Additional Censoring at Incident CVD.<sup>a</sup>

| Outcome                           | Omega-3 group                    | Placebo group | HR (95% CI)        | P-value |
|-----------------------------------|----------------------------------|---------------|--------------------|---------|
|                                   | <i>Event/no. of participants</i> |               |                    |         |
| Total depression <sup>b</sup>     | 638/9171                         | 566/9182      | 1.14 (1.02 – 1.28) | 0.02    |
| Incident depression <sup>c</sup>  | 483/8322                         | 416/8335      | 1.17 (1.03 – 1.34) | 0.02    |
| Recurrent depression <sup>c</sup> | 155/849                          | 150/847       | 1.04 (0.83 – 1.30) | 0.76    |

Abbreviation: HR, hazard ratio; CI, confidence interval

<sup>a</sup> Analyses were from Cox regression models that were controlled for age, sex, and vitamin D3 randomization group. Analyses were not adjusted for multiple comparisons.

<sup>b</sup> Depression is a composite outcome comprising reported presence of clinician diagnosis of depression, treatment for depression and/or symptoms above the validated cutoff for major depression on the PHQ-8 (PHQ-8 ≥ 10); total depression consists of all incident and recurrent depression combined.

<sup>c</sup> Incident and recurrent depression were exploratory outcomes. Incident depression was defined as depression cases that occurred among those with no past history of depression; recurrent depression was defined as depression cases that occurred among those with past history of depression, but not under treatment or active in the past 2 years.

**eTable 6b.** Hazard Ratios and 95% CIs for Total, Incident, and Recurrent Depression, According to Randomized Assignment to Omega-3 Fatty Acid or Placebo, with Additional Adjustment for CVD as a Time-Dependent Covariate.<sup>a</sup>

| Outcome                           | Omega-3 group                    | Placebo group | HR (95% CI)        | P-value |
|-----------------------------------|----------------------------------|---------------|--------------------|---------|
|                                   | <i>Event/no. of participants</i> |               |                    |         |
| Total depression <sup>b</sup>     | 651/9171                         | 583/9182      | 1.13 (1.01 – 1.26) | 0.03    |
| Incident depression <sup>c</sup>  | 493/8322                         | 427/8335      | 1.17 (1.03 – 1.33) | 0.02    |
| Recurrent depression <sup>c</sup> | 158/849                          | 156/847       | 1.02 (0.82 – 1.27) | 0.87    |

Abbreviation: HR, hazard ratio; CI, confidence interval

<sup>a</sup> Analyses were from Cox regression models that were controlled for age, sex, time-dependent CVD variable and vitamin D3 randomization group. Analyses were not adjusted for multiple comparisons.

<sup>b</sup> Depression is a composite outcome comprising reported presence of clinician diagnosis of depression, treatment for depression and/or symptoms above the validated cutoff for major depression on the PHQ-8 (PHQ-8 $\geq$ 10); total depression consists of all incident and recurrent depression combined.

<sup>c</sup> Incident and recurrent depression were exploratory outcomes. Incident depression was defined as depression cases that occurred among those with no past history of depression; recurrent depression was defined as depression cases that occurred among those with past history of depression, but not under treatment or active in the past 2 years.

**eTable 7a.** Hazard Ratios and 95% CIs for Total, Incident, and Recurrent Depression, According to Randomized Assignment to Omega-3 Fatty Acid or Placebo, with Additional Censoring at Incident Cancer.<sup>a</sup>

| Outcome                           | Omega-3 group                    | Placebo group | HR (95% CI)        | P-value |
|-----------------------------------|----------------------------------|---------------|--------------------|---------|
|                                   | <i>Event/no. of participants</i> |               |                    |         |
|                                   |                                  |               |                    |         |
| Total depression <sup>b</sup>     | 629/9171                         | 563/9182      | 1.13 (1.01 – 1.27) | 0.04    |
| Incident depression <sup>c</sup>  | 474/8322                         | 412/8335      | 1.16 (1.02 – 1.33) | 0.03    |
| Recurrent depression <sup>c</sup> | 155/849                          | 151/847       | 1.04 (0.83 – 1.30) | 0.75    |

Abbreviation: HR, hazard ratio; CI, confidence interval

<sup>a</sup> Analyses were from Cox regression models that were controlled for age, sex, and vitamin D3 randomization group. Analyses were not adjusted for multiple comparisons.

<sup>b</sup> Depression is a composite outcome comprising reported presence of clinician diagnosis of depression, treatment for depression and/or symptoms above the validated cutoff for major depression on the PHQ-8(PHQ-8 $\geq$ 10); total depression consists of all incident and recurrent depression combined.



<sup>c</sup> Incident and recurrent depression were exploratory outcomes. Incident depression was defined as depression cases that occurred among those with no past history of depression; recurrent depression was defined as depression cases that occurred among those with past history of depression, but not under treatment or active in the past 2 years.

**eTable 7b.** Hazard Ratios and 95% CIs for Total, Incident, and Recurrent Depression, According to Randomized Assignment to Omega-3 Fatty Acid or Placebo, with Additional Adjustment for Total Cancer as a Time-Dependent Covariate.<sup>a</sup>

| Outcome                           | Omega-3 group                         | Placebo group | HR (95% CI)        | P-value |
|-----------------------------------|---------------------------------------|---------------|--------------------|---------|
|                                   | <i>no. of participants with event</i> |               |                    |         |
| Total depression <sup>b</sup>     | 651/9171                              | 583/9182      | 1.13 (1.01 – 1.26) | 0.03    |
| Incident depression <sup>c</sup>  | 493/8322                              | 427/8335      | 1.17 (1.03 – 1.33) | 0.02    |
| Recurrent depression <sup>c</sup> | 158/849                               | 156/847       | 1.02 (0.81 – 1.27) | 0.88    |

Abbreviation: HR, hazard ratio; CI, confidence interval

<sup>a</sup> Analyses were from Cox regression models that were controlled for age, sex, time-dependent malignant cancer and vitamin D3 randomization group. Analyses were not adjusted for multiple comparisons.

<sup>b</sup> Depression is a composite outcome comprising reported presence of clinician diagnosis of depression, treatment for depression and/or symptoms above the validated cutoff for major depression on the PHQ-8 (PHQ-8 $\geq$ 10); total depression consists of all incident and recurrent depression combined.

<sup>c</sup> Incident and recurrent depression were exploratory outcomes. Incident depression was defined as depression cases that occurred among those with no past history of depression; recurrent depression was defined as depression cases that occurred among those with past history of depression, but not under treatment or active in the past 2 years.

**Description of Results from Sensitivity Analyses in eTable 6 and eTable 7.**

There were no differences in results with additional censoring at developing of parent trial CVD outcomes (total depression HR, 95% CI: 1.14, 1.02-1.28). While development of CVD was strongly associated with 3-fold risk of total depression (HR, 95% CI: 2.96, 2.05-4.27), incident depression (HR, 95% CI: 2.72, 1.76-4.21) and recurrent depression (HR, 95% CI: 2.85, 1.46-5.55), and omega-3 was associated with reduced risk of several secondary CVD outcomes in the parent trial<sup>3</sup>, there were no differences in results for the effect of omega-3 on depression risk when including CVD as a time-updated covariate (total depression HR, 95% CI: 1.13, 1.01-1.26). Development of cancer was not statistically significantly associated with total (HR, 95% CI: 1.21, 0.89-1.65), incident (HR, 95% CI: 1.28, 0.91-1.81) or recurrent depression (HR, 95% CI: 0.97, 0.48-1.97). As with CVD outcomes, there were no differences in results when censoring or adjusting for time-updated parent trial cancer outcomes.

**eTable 8.** Subdistribution Hazard Models Comparing the Risk of Depression in the Omega-3 Fatty Acid and Placebo Groups.<sup>a</sup>

| <b>Outcome</b>                    | <b>No. of participants</b> | <b>HR (95% CI)</b> | <b>P-value</b> |
|-----------------------------------|----------------------------|--------------------|----------------|
| Total depression <sup>b</sup>     | 18,353                     | 1.13 (1.01-1.26)   | 0.03           |
| Incident depression <sup>c</sup>  | 16,657                     | 1.17 (1.02-1.33)   | 0.02           |
| Recurrent depression <sup>c</sup> | 1696                       | 1.01 (0.81-1.26)   | 0.91           |

Abbreviation: HR, hazard ratio; CI, confidence interval

<sup>a</sup> The adjusted HRs were computed from the Fine and Gray subdistribution hazard models. Analyses used the Fine-Gray competing risks approach; death from any cause was treated as a competing rather than censored event. Results from the subdistribution hazard models are shown for total, incident and recurrent depression or clinically relevant depressive symptoms.

<sup>b</sup> Depression is a composite outcome comprising reported presence of clinician diagnosis of depression, treatment for depression and/or symptoms above the validated cutoff for major depression on the PHQ-8 (PHQ-8 $\geq$ 10); total depression consists of all incident and recurrent depression combined.

<sup>c</sup> Incident and recurrent depression were exploratory outcomes. Incident depression was defined as depression cases that occurred among those with no past history of depression; recurrent depression was defined as depression cases that occurred among those with past history of depression, but not under treatment or active in the past 2 years.

**eTable 9.** Adjusted Differences in Change in PHQ-8 Scores Since Baseline, Comparing Omega-3 Fatty Acid to Placebo.<sup>a</sup>

| <b>Effect</b>                             | <b>Omega-3 group, N</b> | <b>Placebo group, N</b> | <b>Rate ratio (95% CI)</b> | <b>P-Value</b> |
|-------------------------------------------|-------------------------|-------------------------|----------------------------|----------------|
| Year 1 vs Baseline                        | 8471                    | 8549                    | 1.03 (0.98-1.08)           | 0.27           |
| Year 2 vs Baseline                        | 8354                    | 8371                    | 1.02 (0.97-1.07)           | 0.44           |
| Year 3 vs Baseline                        | 8116                    | 8172                    | 1.04 (0.99-1.09)           | 0.16           |
| Year 4 vs Baseline                        | 7676                    | 7690                    | 1.03 (0.98-1.08)           | 0.28           |
| Year 5 vs Baseline                        | 5295                    | 5252                    | 0.99 (0.94-1.04)           | 0.83           |
| <b>Average over Years 1-5 vs Baseline</b> | <b>9171</b>             | <b>9182</b>             | <b>1.02 (0.98-1.06)</b>    | <b>0.23</b>    |

Abbreviation: CI, confidence interval; PHQ, patient health questionnaire

<sup>a</sup> Analyses were from repeated measures negative binomial regression models, with follow-up time modeled as an indicator; models were controlled for age, sex, and vitamin D3 randomization group. Results show rate ratios (RRs) and 95% confidence intervals (95% CIs), which reflect percent differences in the change in severity on the PHQ-8 score comparing omega-3 fatty acid to placebo treatment group. RRs are shown for each follow-up time point, and for the average over all follow-up. Results show no significant differences between the treatment groups in change in PHQ-8 scores since baseline.

**eTable 10.** Adjusted Means at Baseline and Mean Change (95% CI) in PHQ-8 Scores at Each Year Since Randomization Compared to Baseline, According to Omega-3 Fatty Acid and Placebo Groups, Censoring PHQ-8 Scores at Date of Mood Safety Letter.<sup>a</sup>

| PHQ-8 score                               | Omega-3 group             |                           | Placebo group             |                           | Mean difference<br>(95% CI) <sup>b</sup> | P-value | P-<br>interaction |
|-------------------------------------------|---------------------------|---------------------------|---------------------------|---------------------------|------------------------------------------|---------|-------------------|
|                                           | Number of<br>participants | Adjusted mean<br>(95% CI) | Number of<br>participants | Adjusted mean<br>(95% CI) |                                          |         |                   |
| Baseline                                  | 9171                      | 1.09 (1.06, 1.13)         | 9182                      | 1.11 (1.08, 1.15)         | --                                       | --      | 0.45              |
| Year 1 vs Baseline                        | 8471                      | 0.05 (0.01, 0.09)         | 8549                      | 0.01 (-0.02, 0.05)        | 0.04 (-0.02, 0.09)                       | 0.20    |                   |
| Year 2 vs Baseline                        | 8320                      | 0.08 (0.04, 0.12)         | 8340                      | 0.05 (0.01, 0.09)         | 0.03 (-0.02, 0.09)                       | 0.25    |                   |
| Year 3 vs Baseline                        | 8053                      | 0.12 (0.08, 0.16)         | 8116                      | 0.07 (0.03, 0.11)         | 0.05 (-0.01, 0.10)                       | 0.13    |                   |
| Year 4 vs Baseline                        | 7580                      | 0.11 (0.07, 0.15)         | 7608                      | 0.07 (0.03, 0.11)         | 0.03 (-0.02, 0.09)                       | 0.26    |                   |
| Year 5 vs Baseline                        | 5210                      | 0.22 (0.17, 0.27)         | 5188                      | 0.23 (0.18, 0.28)         | -0.01 (-0.08, 0.06)                      | 0.77    |                   |
| Average (across Years<br>1-5) vs Baseline | 9171                      |                           | 9182                      |                           | 0.03 (-0.01, 0.08)                       | 0.16    |                   |

Abbreviation: PHQ, patient health questionnaire; CI, confidence interval

<sup>a</sup> Analyses were from general linear models of response profiles to estimate the means, with time modeled as indicator variables; models were controlled for age, sex, and vitamin D3 randomization group. Adjusted means (95% CI) within each treatment group are

shown at baseline and adjusted mean differences in change (95% CI) within each treatment group are shown for each follow-up time point. P-interaction is from the 5-degree-freedom test of the treatment-x-time interaction term in the model.

<sup>b</sup> Mean differences in change comparing omega-3 fatty acid and placebo groups; the last row shows the adjusted mean difference (95% CI) between the omega-3 fatty acid and placebo groups in PHQ-8 change scores averaged across all follow-up years (years 1-5 vs. baseline).



**Description of Results from Sensitivity Analyses in eTable 10.**

As described in Methods published previously (Okereke et al., JAMA, 2020; Supplement 2, eMethods)<sup>4</sup>, enhanced follow-up procedures were instituted for those with elevated PHQ-8 scores. Participants with elevated PHQ-8 scores ( $\geq 10$  algorithm cutoff) at baseline and follow-up were contacted via mailed letters, where there was no current self-report by the participant of both recent diagnosis and treatment of depression. Among all participants who scored PHQ-8 $\geq 15$ , the same letters were sent regardless of recent self-reported diagnosis or treatment for depression. It was recognized that receipt of a letter intended to raise a participant's awareness of mood problems may influence his or her self-report of mood on a subsequent questionnaire, and this may have potential to bias results. Thus, in this analysis PHQ-8 scores were censored after the date that a mood safety letter was sent (i.e., PHQ-8 responses that occurred after the send date of a mood safety letter did not contribute to the outcome). Results showed that estimates observed in this sensitivity analysis are similar to those in the primary analysis.

**eTable 11.** Adjusted Means at Baseline and Mean Change (95% CI) in PHQ-8 Scores at Each Year Since Randomization Compared to Baseline, According to Omega-3 Fatty Acid and Placebo Groups, Omitting Year 5 PHQ-8 Score.<sup>a</sup>

| PHQ-8 score                                  | Omega-3 group             |                           | Placebo group             |                           | Mean difference<br>(95% CI) <sup>b</sup> | P-value | P-<br>interaction |
|----------------------------------------------|---------------------------|---------------------------|---------------------------|---------------------------|------------------------------------------|---------|-------------------|
|                                              | Number of<br>participants | Adjusted mean<br>(95% CI) | Number of<br>participants | Adjusted mean<br>(95% CI) |                                          |         |                   |
| Baseline                                     | 9171                      | 1.09 (1.06, 1.13)         | 9182                      | 1.11 (1.08, 1.15)         | --                                       | --      | 0.58              |
| Year 1 vs Baseline                           | 8471                      | 0.05 (0.01, 0.09)         | 8549                      | 0.01 (-0.02, 0.05)        | 0.03 (-0.02, 0.09)                       | 0.21    |                   |
| Year 2 vs Baseline                           | 8354                      | 0.07 (0.03, 0.11)         | 8371                      | 0.04 (0.00, 0.08)         | 0.02 (-0.03, 0.08)                       | 0.41    |                   |
| Year 3 vs Baseline                           | 8116                      | 0.10 (0.06, 0.14)         | 8172                      | 0.06 (0.02, 0.10)         | 0.05 (-0.01, 0.10)                       | 0.13    |                   |
| Year 4 vs Baseline                           | 7676                      | 0.08 (0.04, 0.12)         | 7690                      | 0.05 (0.01, 0.09)         | 0.03 (-0.02, 0.09)                       | 0.26    |                   |
| Average (across<br>Years 1-4) vs<br>Baseline | 9171                      | --                        | 9182                      | --                        | 0.03 (-0.01, 0.08)                       | 0.13    |                   |

Abbreviation: CI, confidence interval; PHQ, patient health questionnaire

<sup>a</sup> Analyses were from general linear models of response profiles to estimate the means, with time modeled as indicator variables; models were controlled for age, sex, and vitamin D3 randomization group. Adjusted means (95% CI) within each treatment group are

shown at baseline and adjusted mean differences in change (95% CI) within each treatment group are shown for each follow-up time point. P-interaction is from the test of the treatment-x-time interaction term in the model.

<sup>b</sup> Mean differences in change comparing omega-3 fatty acid and placebo groups; the last row shows the adjusted mean difference (95% CI) between the omega-3 fatty acid and placebo groups in PHQ-8 change scores averaged across all follow-up years (years 1-4 vs. baseline).

**eTable 12.** Total, Incident and Recurrent Rates of Depression, per 1000 Person-Years (p-y), by Omega-3 Fatty Acid and Placebo Groups.

| <b>Omega-3 group</b>              |                        |       |              |
|-----------------------------------|------------------------|-------|--------------|
| Outcome                           | Number of participants | Cases | Per 1000 p-y |
| Total depression <sup>a</sup>     | 9171                   | 651   | 13.9         |
| Incident depression <sup>b</sup>  | 8322                   | 493   | 11.5         |
| Recurrent depression <sup>b</sup> | 849                    | 158   | 38.8         |
| <b>Placebo group</b>              |                        |       |              |
| Outcome                           | Number of participants | Cases | Per 1000 p-y |
| Total depression <sup>a</sup>     | 9182                   | 583   | 12.3         |
| Incident depression <sup>b</sup>  | 8335                   | 427   | 9.9          |
| Recurrent depression <sup>b</sup> | 847                    | 156   | 38.2         |

<sup>a</sup> Depression is a composite outcome comprising reported presence of clinician diagnosis of depression, treatment for depression and/or symptoms above the validated cutoff for major depression on the PHQ-8 (PHQ-8 $\geq$ 10); total depression consists of all incident and recurrent depression combined.

<sup>b</sup> Incident and recurrent depression were exploratory outcomes. Incident depression was defined as depression cases that occurred among those with no past history of depression; recurrent depression was defined as depression cases that occurred among those with past history of depression, but not under treatment or active in the past 2 years.

**eTable 13.** Means (SDs) of PHQ-8 Scores at Each Time Point, in Omega-3 Fatty Acid and Placebo Groups.

| <b>Time</b> | <b>Omega-3 group</b> | <b>Placebo group</b> |
|-------------|----------------------|----------------------|
| Baseline    | 1.09 (1.60)          | 1.11 (1.62)          |
| Year 1      | 1.12 (1.95)          | 1.11 (1.89)          |
| Year 2      | 1.13 (2.02)          | 1.13 (1.94)          |
| Year 3      | 1.15 (2.04)          | 1.13 (1.96)          |
| Year 4      | 1.12 (1.98)          | 1.11 (1.93)          |
| Year 5      | 1.21 (2.06)          | 1.25 (2.10)          |

Abbreviation: PHQ, patient health questionnaire

**eTable 14a.** Hazard Ratios and 95% CIs for Total, Incident, and Recurrent Depression among Older Males, According to Randomized Assignment to Omega-3 Fatty Acid or Placebo Groups.<sup>a</sup>

| Outcome                           | Omega-3 group                    | Placebo group | HR (95% CI)        | P-value |
|-----------------------------------|----------------------------------|---------------|--------------------|---------|
|                                   | <i>Event/no. of participants</i> |               |                    |         |
|                                   |                                  |               |                    |         |
| Incident depression <sup>b</sup>  | 208/4305                         | 218/4337      | 0.96 (0.80 - 1.17) | 0.71    |
| Recurrent depression <sup>b</sup> | 64/369                           | 58/319        | 0.94 (0.66 - 1.34) | 0.74    |

Abbreviation: HR, hazard ratio; CI, confidence interval

<sup>a</sup> Analyses were from Cox regression models that were controlled for age, sex, and vitamin D3 randomization group. Analyses were not adjusted for multiple comparisons.

<sup>b</sup> Incident and recurrent depression were exploratory outcomes. Incident depression was defined as depression cases that occurred among those with no past history of depression; recurrent depression was defined as depression cases that occurred among those with past history of depression, but not under treatment or active in the past 2 years.

**eTable 14b.** Hazard Ratios and 95% CIs for Total, Incident, and Recurrent Depression among Older Females, According to Randomized Assignment to Omega-3 Fatty Acid or Placebo Groups.<sup>a</sup>

| Outcome                           | Omega-3 group                    | Placebo group | HR (95% CI)        | P-value |
|-----------------------------------|----------------------------------|---------------|--------------------|---------|
|                                   | <i>Event/no. of participants</i> |               |                    |         |
| Incident depression <sup>b</sup>  | 285/4017                         | 209/3998      | 1.38 (1.15 - 1.65) | <0.001  |
| Recurrent depression <sup>b</sup> | 94/480                           | 98/528        | 1.06 (0.80 - 1.40) | 0.70    |

Abbreviation: HR, hazard ratio; CI, confidence interval

<sup>a</sup> Analyses were from Cox regression models that were controlled for age, sex, and vitamin D3 randomization group. Analyses were not adjusted for multiple comparisons.

<sup>b</sup> Incident and recurrent depression were exploratory outcomes. Incident depression was defined as depression cases that occurred among those with no past history of depression; recurrent depression was defined as depression cases that occurred among those with past history of depression, but not under treatment or active in the past 2 years.



**eTable 15.** Hazard Ratios and 95% CIs for Total, Incident, and Recurrent Depression, According to Randomized Assignment to Omega-3 Fatty Acid or Placebo, Excluding the First 2 Years of Follow-up.<sup>a</sup>

| Outcome                           | Omega-3 group                     | Placebo group | HR (95% CI)        | P-value |
|-----------------------------------|-----------------------------------|---------------|--------------------|---------|
|                                   | <i>Events/no. of participants</i> |               |                    |         |
| Total depression <sup>b</sup>     | 395/8845                          | 370/8906      | 1.08 (0.94 – 1.25) | 0.27    |
| Incident depression <sup>c</sup>  | 303/8067                          | 280/8127      | 1.10 (0.93 – 1.29) | 0.26    |
| Recurrent depression <sup>c</sup> | 92/778                            | 90/779        | 1.02 (0.76 – 1.37) | 0.88    |

Abbreviation: HR, hazard ratio; CI, confidence interval

<sup>a</sup> Analyses were from Cox regression models that were controlled for age, sex, and vitamin D3 randomization group. Events occurring in the first 2 years of follow-up were excluded. Analyses were not adjusted for multiple comparisons.

<sup>b</sup> Depression is a composite outcome comprising reported presence of clinician diagnosis of depression, treatment for depression and/or symptoms above the validated cutoff for major depression on the PHQ-8 (PHQ-8 $\geq$ 10); total depression consists of all incident and recurrent depression combined.

<sup>c</sup> Incident and recurrent depression were exploratory outcomes. Incident depression was defined as depression cases that occurred among those with no past history of depression; recurrent depression was defined as depression cases that occurred among those with past history of depression, but not under treatment or active in the past 2 years.

**eTable 16.** Hazard Ratios and 95% CIs of Total, Incident, and Recurrent Depression among Participants with Mild Depressive Symptoms, According to Randomized Assignment to Omega-3 Fatty Acid or Placebo Groups.<sup>a</sup>

| Outcome                           | Omega-3 group                    | Placebo group | HR (95% CI)        | P-value |
|-----------------------------------|----------------------------------|---------------|--------------------|---------|
|                                   | <i>Event/no. of participants</i> |               |                    |         |
| Total depression <sup>b</sup>     | 77/267                           | 73/268        | 1.09 (0.79 - 1.50) | 0.60    |
| Incident depression <sup>c</sup>  | 51/216                           | 53/214        | 0.96 (0.66 - 1.42) | 0.85    |
| Recurrent depression <sup>c</sup> | 26/51                            | 20/54         | 1.55 (0.86 - 2.80) | 0.15    |

Abbreviation: HR, hazard ratio; CI, confidence interval

<sup>a</sup> PHQ-8 score between 5-9 points were used to define mild depressive symptoms. Analyses to compute HRs and CIs were from Cox regression models that were controlled for age, sex, and vitamin D3 randomization group.

<sup>b</sup> Depression is a composite outcome comprising reported presence of clinician diagnosis of depression, treatment for depression and/or symptoms above the validated cutoff for major depression on the PHQ-8 (PHQ-8 $\geq$ 10); total depression consists of all incident and recurrent depression combined.

<sup>c</sup> Incident and recurrent depression were exploratory outcomes. Incident depression was defined as depression cases that occurred among those with no past history of depression; recurrent depression was defined as depression cases that occurred among those with past history of depression, but not under treatment or active in the past 2 years.

**eTable 17.** Adjusted Means at Baseline and Mean Change (95% CI) in PHQ-8 Scores at Each Year Since Randomization Compared to Baseline, According to Omega-3 Fatty Acid and Placebo Groups, among Participants with Mild Depressive Symptoms.<sup>a</sup>

| PHQ-8 score                               | Omega-3 group             |                           | Placebo group             |                           | Mean difference<br>(95% CI) <sup>b</sup> | P-value | P-<br>interaction |
|-------------------------------------------|---------------------------|---------------------------|---------------------------|---------------------------|------------------------------------------|---------|-------------------|
|                                           | Number of<br>participants | Adjusted mean<br>(95% CI) | Number of<br>participants | Adjusted mean<br>(95% CI) |                                          |         |                   |
| Baseline                                  | 267                       | 6.81 (6.69, 6.93)         | 268                       | 6.95 (6.82, 7.08)         | --                                       | --      | 0.34              |
| Year 1 vs Baseline                        | 237                       | -2.35 (-2.82, -1.88)      | 233                       | -2.80 (-3.25, -2.35)      | 0.45 (-0.20, 1.10)                       | 0.18    |                   |
| Year 2 vs Baseline                        | 224                       | -2.13 (-2.69, -1.58)      | 217                       | -2.86 (-3.30, -2.43)      | 0.73 (0.03, 1.43)                        | 0.04    |                   |
| Year 3 vs Baseline                        | 217                       | -2.44 (-2.91, -1.96)      | 218                       | -2.74 (-3.21, -2.28)      | 0.31 (-0.36, 0.98)                       | 0.37    |                   |
| Year 4 vs Baseline                        | 197                       | -2.42 (-2.94, -1.90)      | 192                       | -2.52 (-3.05, -1.99)      | 0.10 (-0.64, 0.84)                       | 0.79    |                   |
| Year 5 vs Baseline                        | 138                       | -2.48 (-3.06, -1.90)      | 130                       | -2.36 (-3.01, -1.72)      | -0.12 (-0.99, 0.75)                      | 0.79    |                   |
| Average (across Years<br>1-5) vs Baseline | 267                       |                           | 268                       |                           | 0.31 (-0.21, 0.83)                       | 0.24    |                   |

Abbreviation: PHQ, patient health questionnaire; CI, confidence interval

<sup>a</sup> PHQ-8 score between 5-9 points were used to define mild depressive symptoms. Analyses were from general linear models of response profiles to estimate the means, with time modeled as indicator variables; models were controlled for age, sex, and vitamin D3

randomization group. Adjusted means (95% CI) within each treatment group are shown at baseline and adjusted mean differences in change (95% CI) within each treatment group are shown for each follow-up time point. P-interaction is from the 5-degree-freedom test of the treatment-x-time interaction term in the model.

<sup>b</sup> Mean differences in change comparing omega-3 fatty acid and placebo groups; the last row shows the adjusted mean difference (95% CI) between the omega-3 fatty acid and placebo groups in PHQ-8 change scores averaged across all follow-up years (years 1-5 vs. baseline).

**eTable 18.** Adverse Events According to Omega-3 Fatty Acid and Placebo Groups.<sup>a</sup>

|                                         | <b>Omega-3 group</b>        | <b>Placebo group</b>         |
|-----------------------------------------|-----------------------------|------------------------------|
|                                         | <b>Affected/at Risk (%)</b> | <b>Affected /at Risk (%)</b> |
| <b>Serious Adverse Events</b>           |                             |                              |
| Major cardiovascular event <sup>b</sup> | 249/9171 (2.7%)             | 270/9182 (2.9%)              |
| Invasive cancer of any type             | 613/9171 (6.7%)             | 572/9182 (6.2%)              |
| All-cause mortality                     | 305/9171 (3.3%)             | 286/9182 (3.1%)              |
| Gastrointestinal bleeding               | 240/9171 (2.6%)             | 246/9182 (2.7%)              |
| Hypercalcemia                           | 91/9171 (1.0%)              | 100/9182 (1.1%)              |
| Suicide                                 | 2/9171 (0.02%)              | 1/9182 (0.01%)               |
| <b>Other Adverse Events</b>             |                             |                              |
| Parathyroid condition <sup>c</sup>      | 27/9171 (0.3%)              | 46/9182 (0.5%)               |
| Kidney stones                           | 289/9171 (3.2%)             | 335/9182 (3.6%)              |

|                       | <b>Omega-3 group</b>        | <b>Placebo group</b>         |
|-----------------------|-----------------------------|------------------------------|
|                       | <b>Affected/at Risk (%)</b> | <b>Affected /at Risk (%)</b> |
| Kidney failure        | 47/9171 (0.5%)              | 56/9182 (0.6%)               |
| Blood in urine        | 626/9171 (6.8%)             | 637/9182 (6.9%)              |
| Easy bruising         | 2276/9171 (24.8%)           | 2308/9182 (25.1%)            |
| Frequent nosebleeds   | 317/9171 (3.5%)             | 322/9182 (3.5%)              |
| Stomach upset or pain | 3231/9171 (35.2%)           | 3219/9182 (35.1%)            |
| Skin rash             | 2293/9171 (25.0%)           | 2289/9182 (24.9%)            |

<sup>a</sup> Adverse events were ascertained systematically throughout the trial on study questionnaires.

<sup>b</sup> Major cardiovascular event was a composite outcome of myocardial infarction, stroke, and death from cardiovascular causes.

<sup>c</sup> Parathyroid condition includes hyperparathyroidism or hypoparathyroidism.



**eFigure 1.** Adjusted Differences in Change in Likelihood of PHQ-8 Item-Level Symptoms, Comparing Omega-3 Fatty Acid to Placebo.<sup>a</sup>

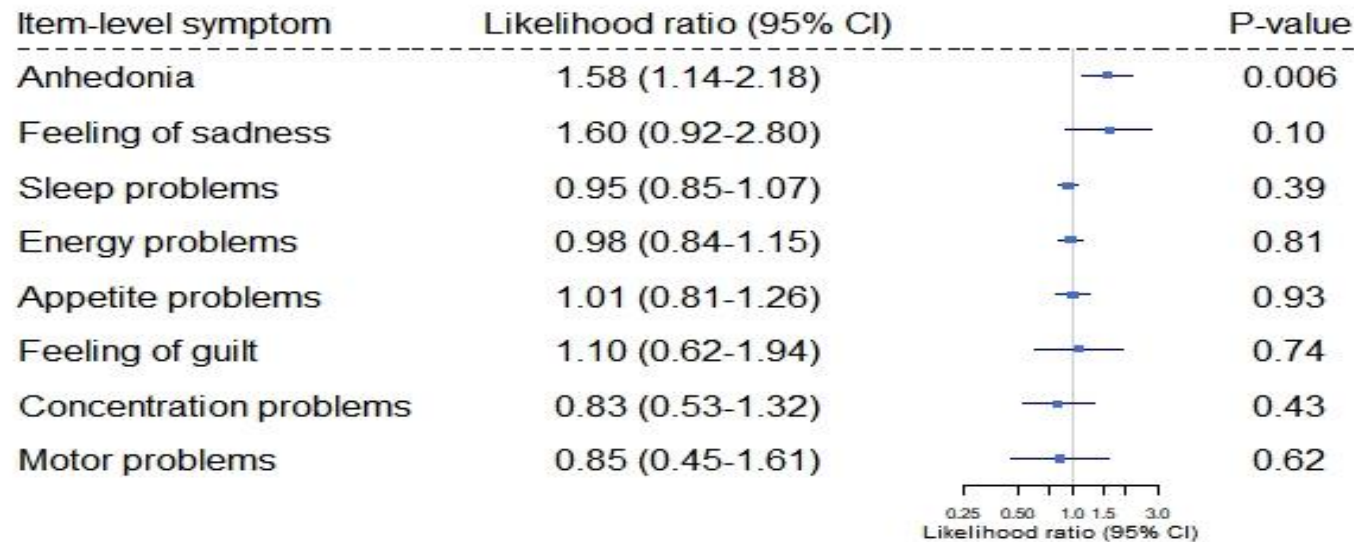

Abbreviation: CI, confidence interval; PHQ, patient health questionnaire

<sup>a</sup> Analyses were from repeated measures logistic regression models, with follow-up time modeled as an indicator; models were controlled for age, sex, and vitamin D3 randomization group. Results show likelihood ratios and 95% confidence intervals (95% CIs), which reflect differences in the change in likelihood of burden from each PHQ-8 item-level symptom, comparing omega-3 fatty acid to placebo treatment group. Differences reflect the average effect over all follow-up times since baseline.

**eFigure 2.** Adjusted Differences in Change in Likelihood of PHQ-8 Item-Level Symptoms, Comparing Omega-3 Fatty Acid to Placebo, Stratified by Biological Sex.<sup>a</sup>

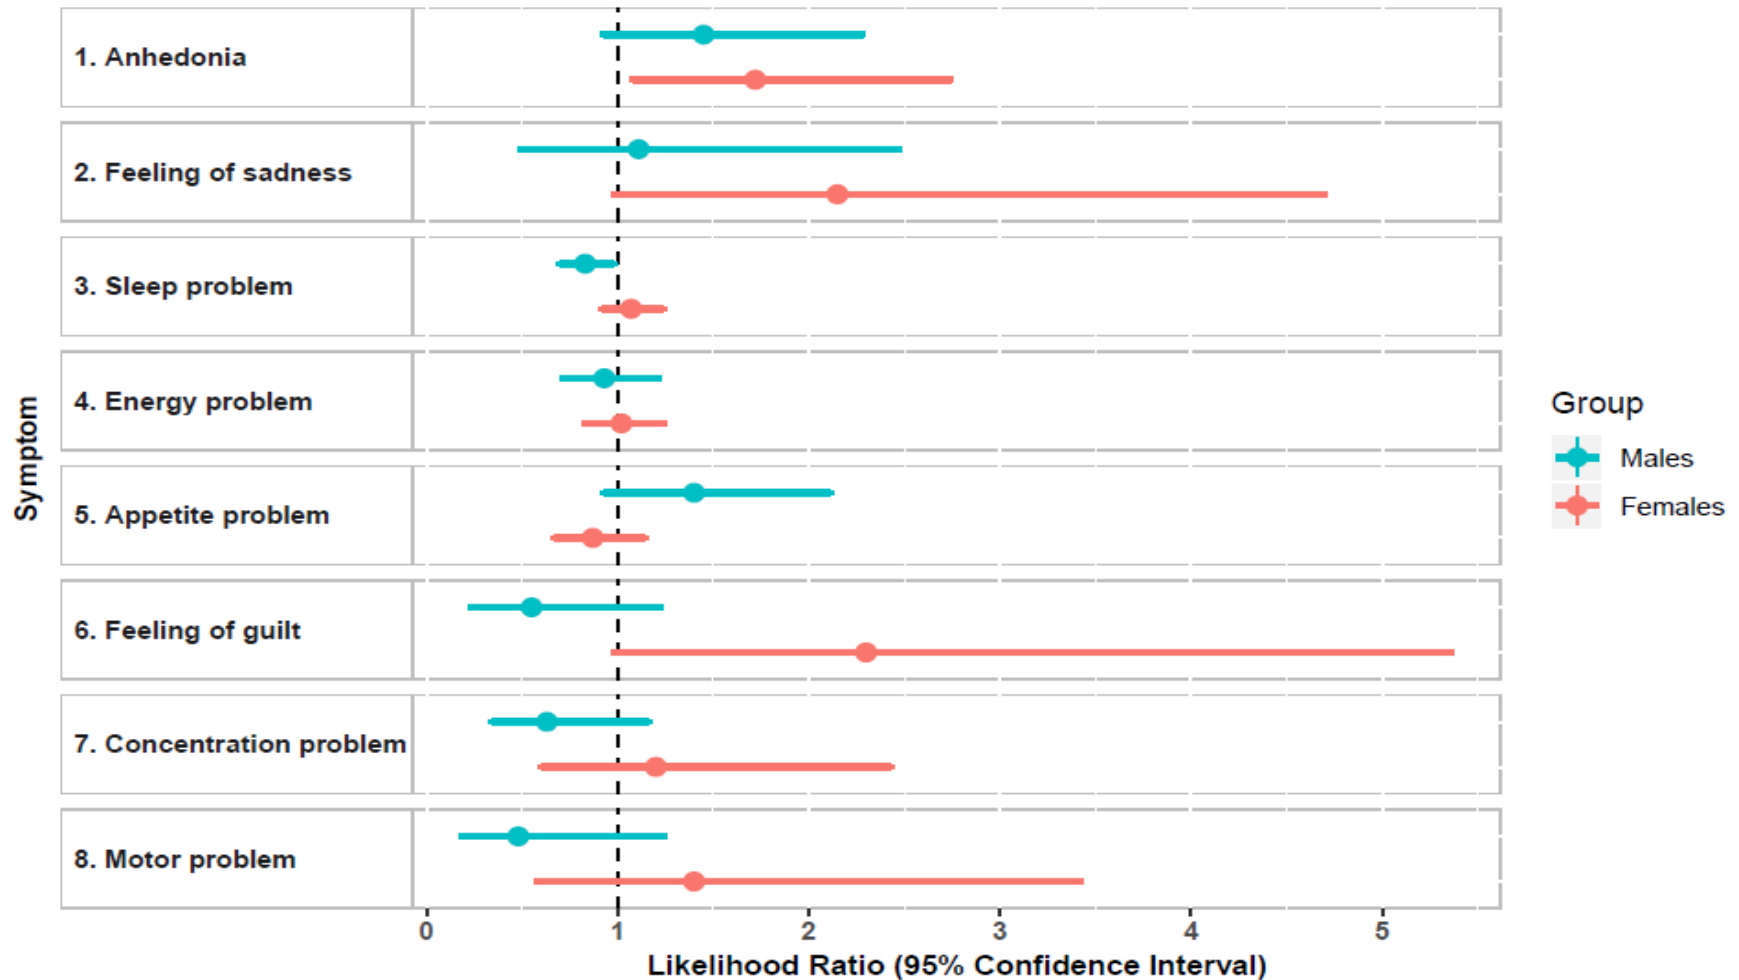

Abbreviation: CI, confidence interval; PHQ, patient health questionnaire

<sup>a</sup> Analyses were from repeated measures logistic regression models stratified by sex, with follow-up time modeled as an indicator; models were controlled for age, sex, and vitamin D3 randomization group. Results show likelihood ratios and 95% CIs, which reflect differences in the change in likelihood of burden from each PHQ-8 item-level symptom among males and females, comparing omega-3 fatty acid to placebo treatment group. Differences reflect the average effect over all follow-up times since baseline.

**eFigure 3.** Kaplan-Meier Survival Curves Stratified by Biological Sex for Time since Randomization until Occurrence of Primary Outcome (Total Depression), in Omega-3 Fatty Acid and Placebo Groups.

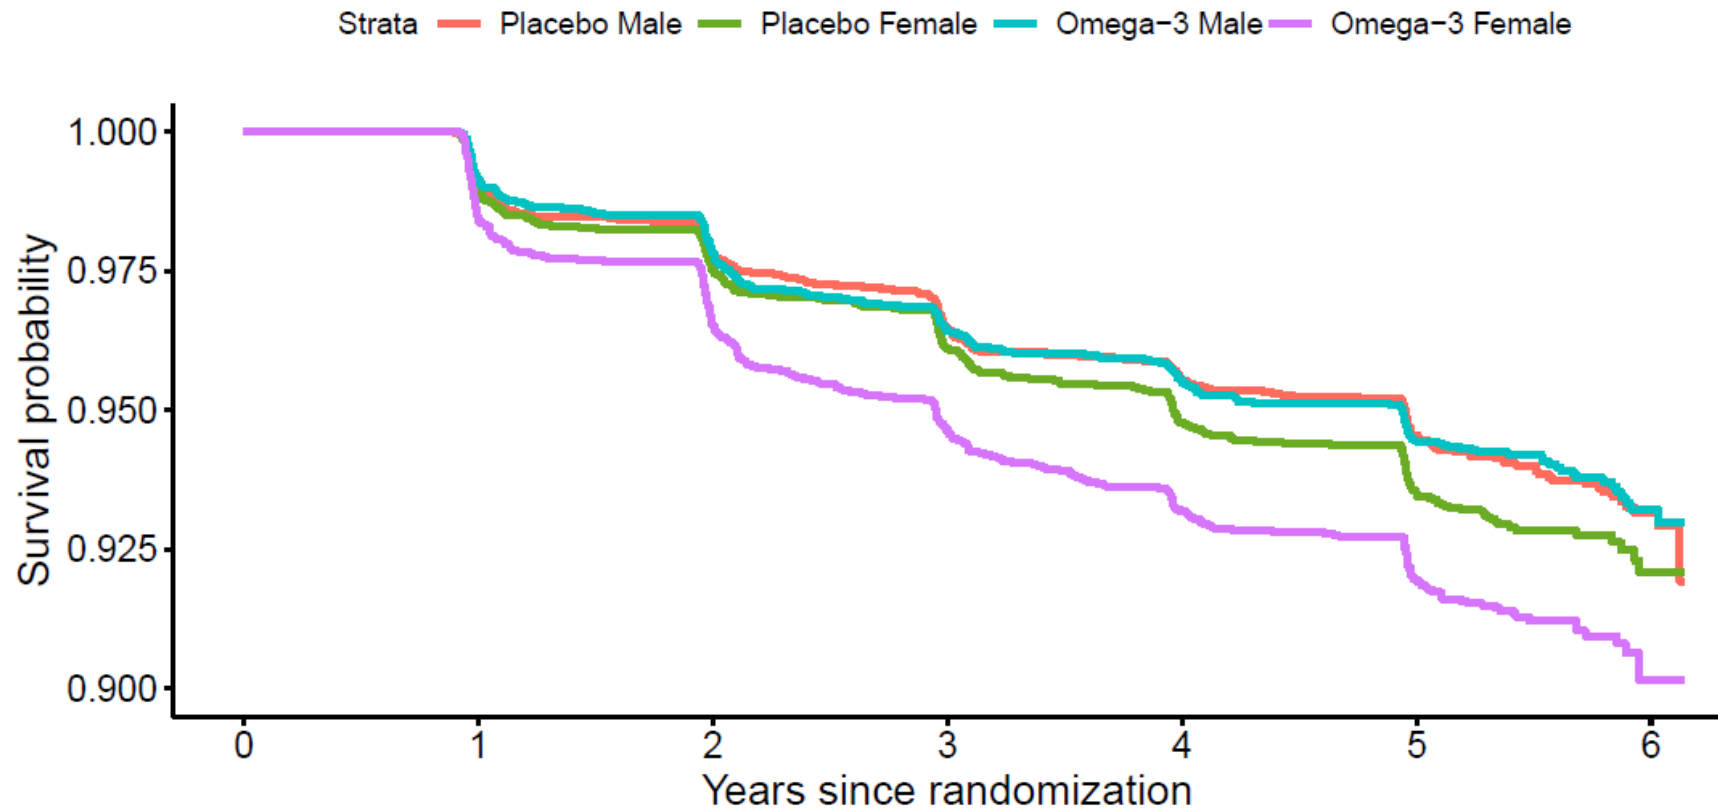

**eFigure 4.** Box Plots of Crude PHQ-8 Scores in the Omega-3 Fatty Acid and Placebo Groups in Each Study Year.<sup>a</sup>

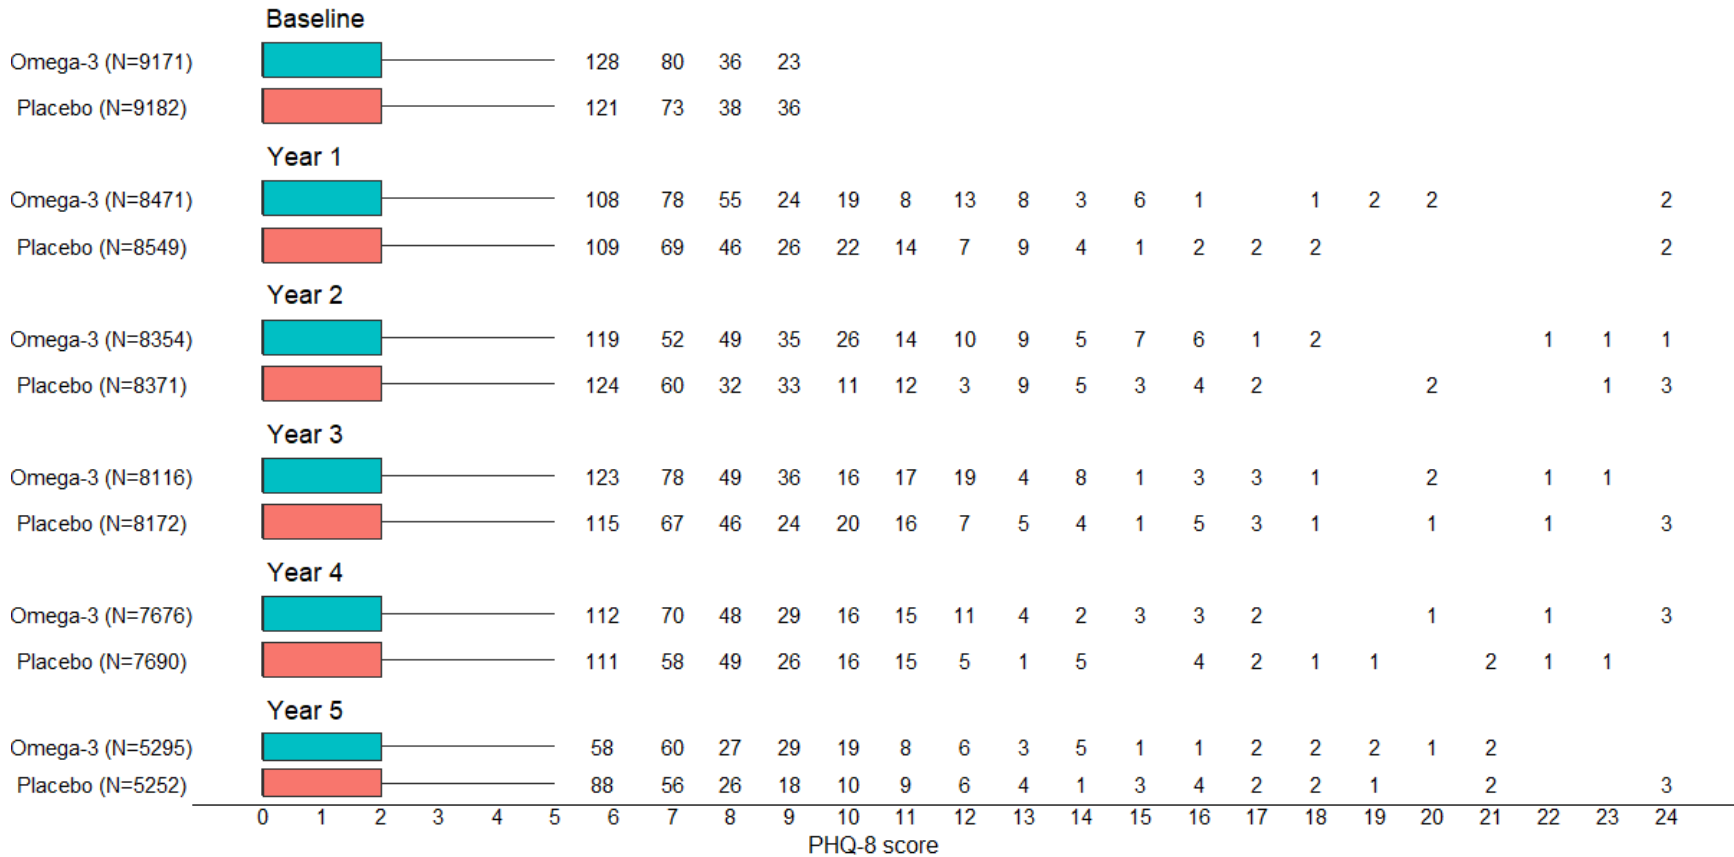

Abbreviation: PHQ, patient health questionnaire

<sup>a</sup> The figure illustrates two horizontal box plots for each study year, with the crude distributions of PHQ-8 scores in the omega-3 fatty acid and placebo groups by study year. The figure also illustrates the number of participants (in the outlier portions of the box plots) at each value of PHQ-8 score in the omega-3 fatty acid and placebo groups.

**eSupplement References**

1. Charlson ME, Pompei P, Ales KL, MacKenzie CR. A new method of classifying prognostic comorbidity in longitudinal studies: Development and validation. *J Chronic Dis.* 1987;40(5):373-383.
2. Deyo RA, Cherkin DC, Ciol MA. Adapting a clinical comorbidity index for use with ICD-9-CM administrative databases. *J Clin Epidemiol.* 1992;45(6):613-619.
3. Manson JE, Cook NR, Lee IM, et al. Marine n-3 fatty acids and prevention of cardiovascular disease and cancer. *N Engl J Med.* 2019;380(1):23-32.
4. Okereke OI, Reynolds CF III, Mischoulon D, et al. Effect of long-term vitamin D3 supplementation vs placebo on risk of depression or clinically relevant depressive symptoms and on change in mood scores: A randomized clinical trial. *JAMA.* 2020;324(5):471-480.
